# Supplementary material for: A naphthalimide-tyrosine-based dicationic amphiphile for intracellular ‘turn-on’ simultaneous detection of ATP and CTP
Source: Royal Society of Chemistry journal article supplement (doi:10.1039/d2ay01550a), 2022-11-28
Supplement: d2ay01550a1.pdf [file d2ay01550a1.pdf]

## Naphthalimide-tyrosine-based dicationic amphiphile for intracellular 'turn-on' simultaneous detection of ATP and CTP

Poonam Sharma<sup>a</sup>, Sugandha Kumar<sup>b</sup>, Amandeep Walia<sup>c</sup>, Satwinder Singh Marok<sup>d</sup>, Vanita Vanita<sup>\*c</sup> and Prabhpreet Singh<sup>\*a</sup>

<sup>a</sup>Department of Chemistry, UGC Centre for Advanced Studies-II, Guru Nanak Dev University, Amritsar 143001 (Pb.)-India

<sup>b</sup>School of Physical Sciences, Starex University, Gurugram

<sup>c</sup>Department of Human Genetics, Guru Nanak Dev University, Amritsar (Pb.)-India

<sup>d</sup>Apotex Inc., 150 Signet Drive, Toronto, ON, M9L1T9 Canada

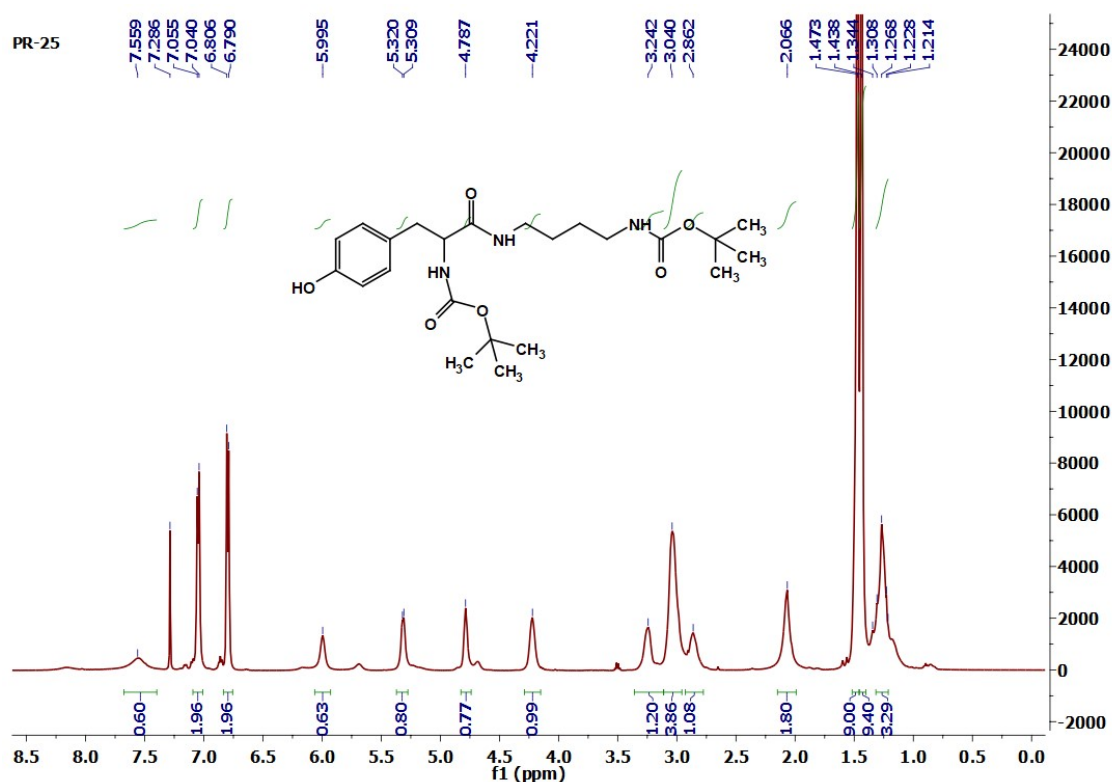

Figure 1a: <sup>1</sup>H NMR Spectrum of compound 2.

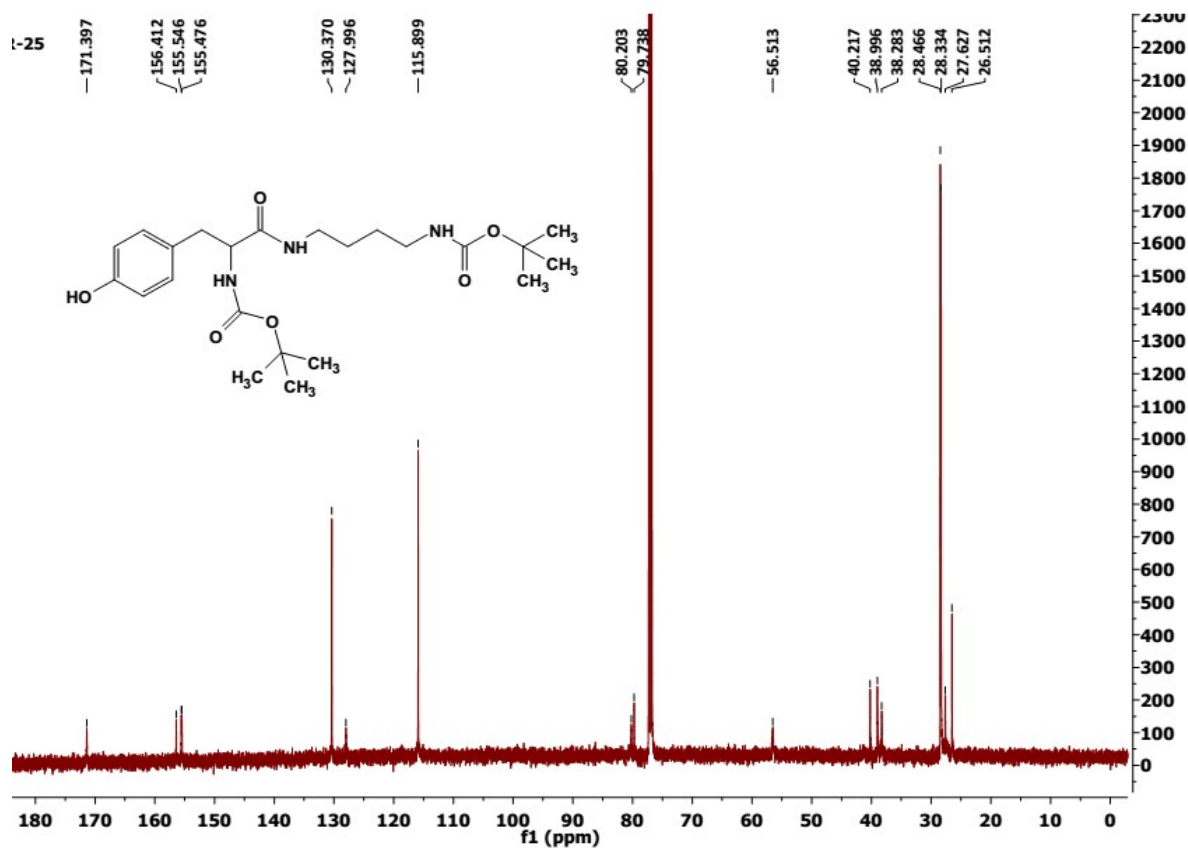

Figure 1b: <sup>13</sup>C NMR Spectrum of compound 2.

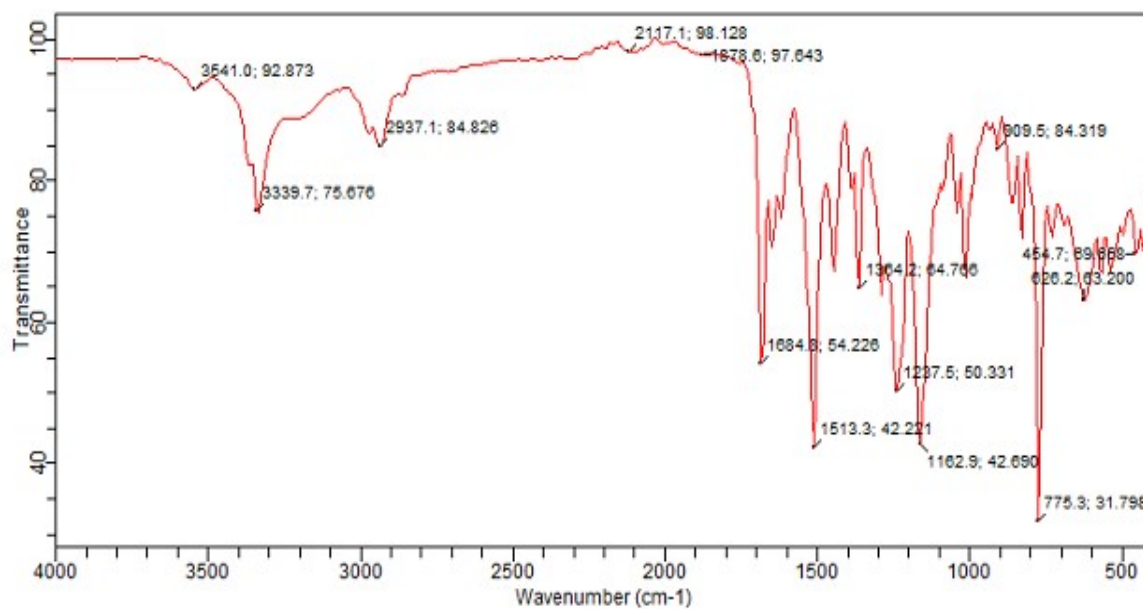

Figure 1c: FTIR Spectrum of compound 2.

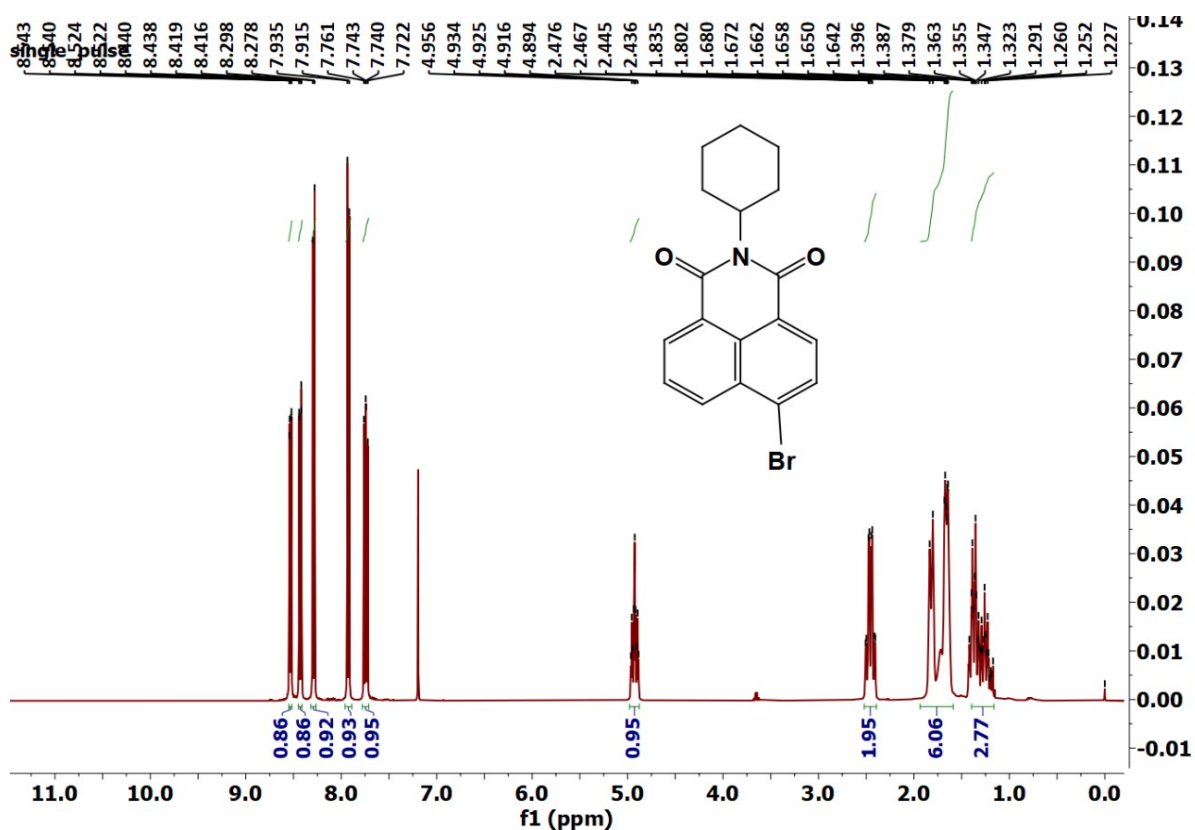

Figure 2a:  $^1\text{H}$  NMR Spectrum of compound 3.

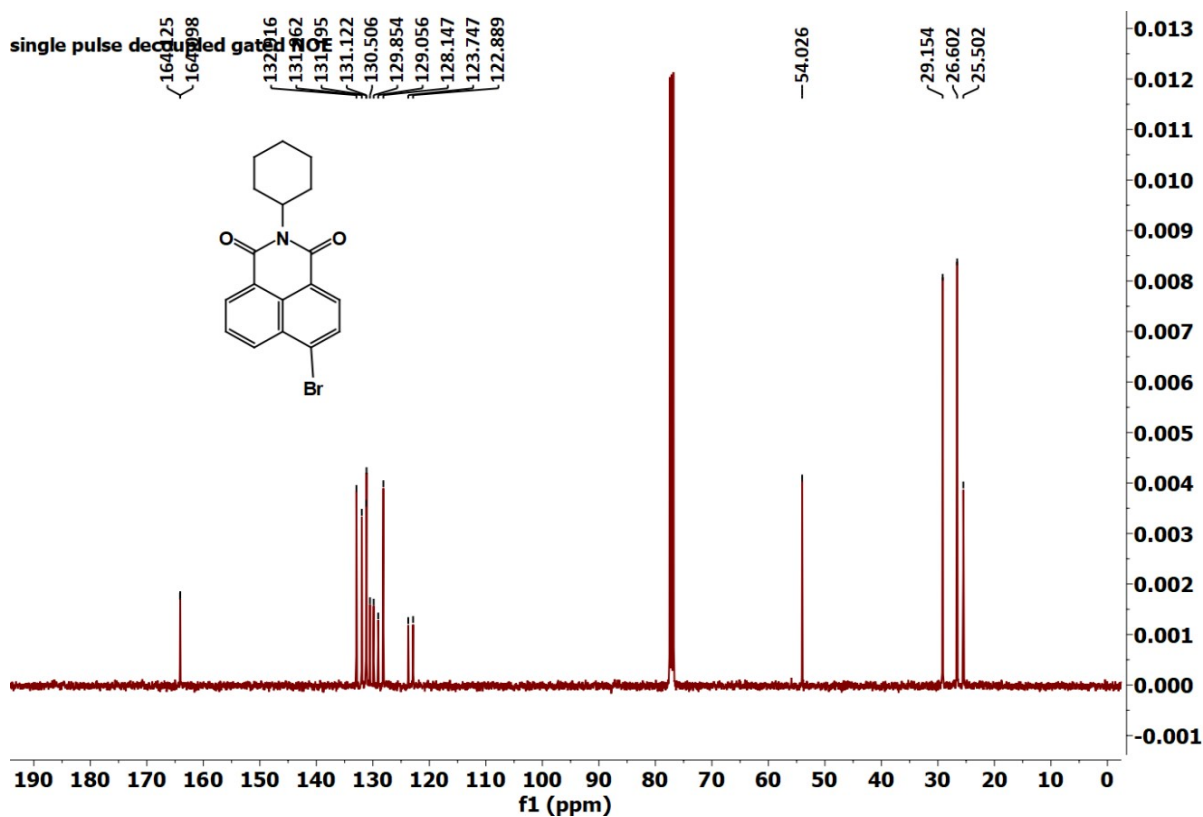

Figure 2b:  $^{13}\text{C}$  NMR Spectrum of compound 3.

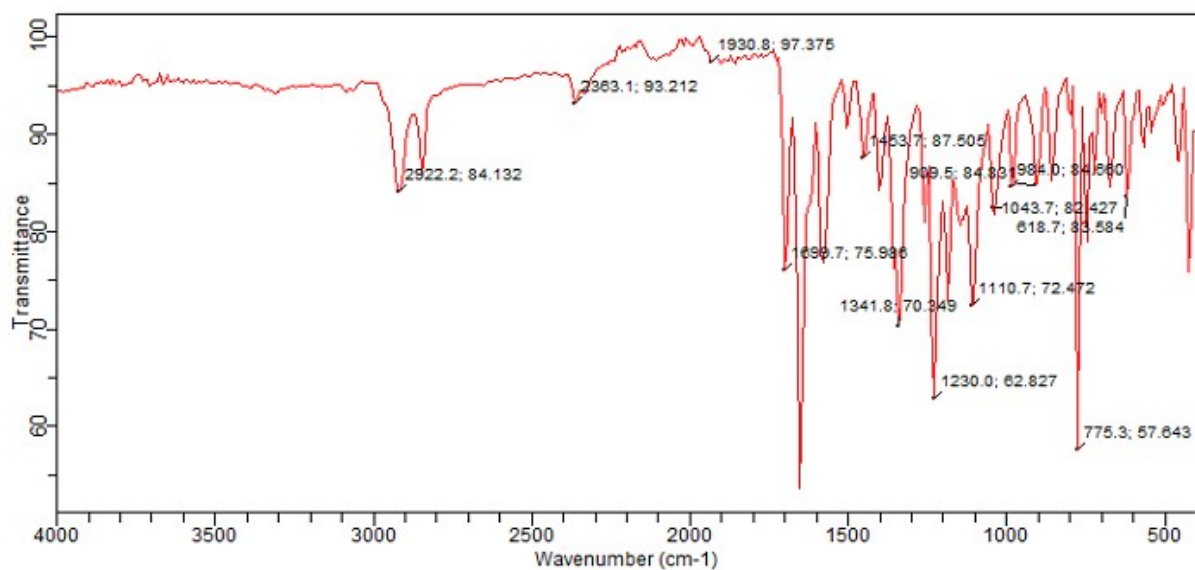

Figure 2c: FTIR Spectrum of compound 3.

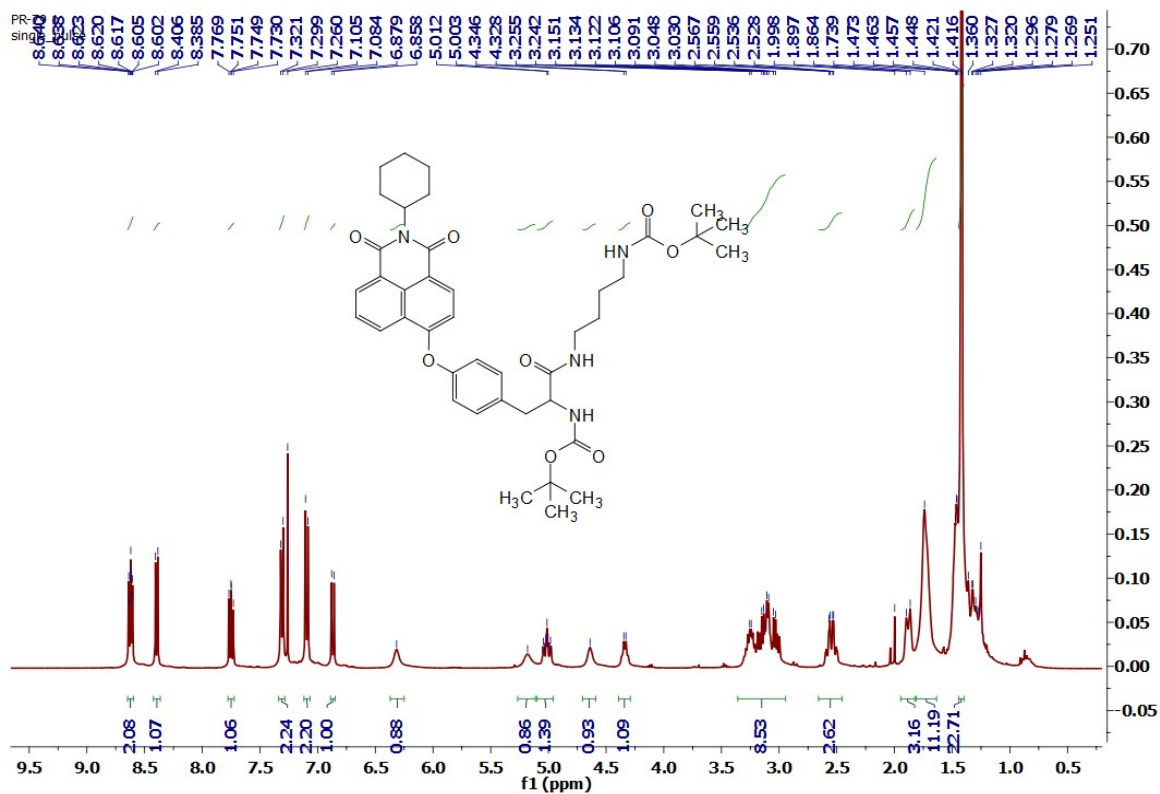

Figure 3a: <sup>1</sup>H NMR Spectrum of compound 4.

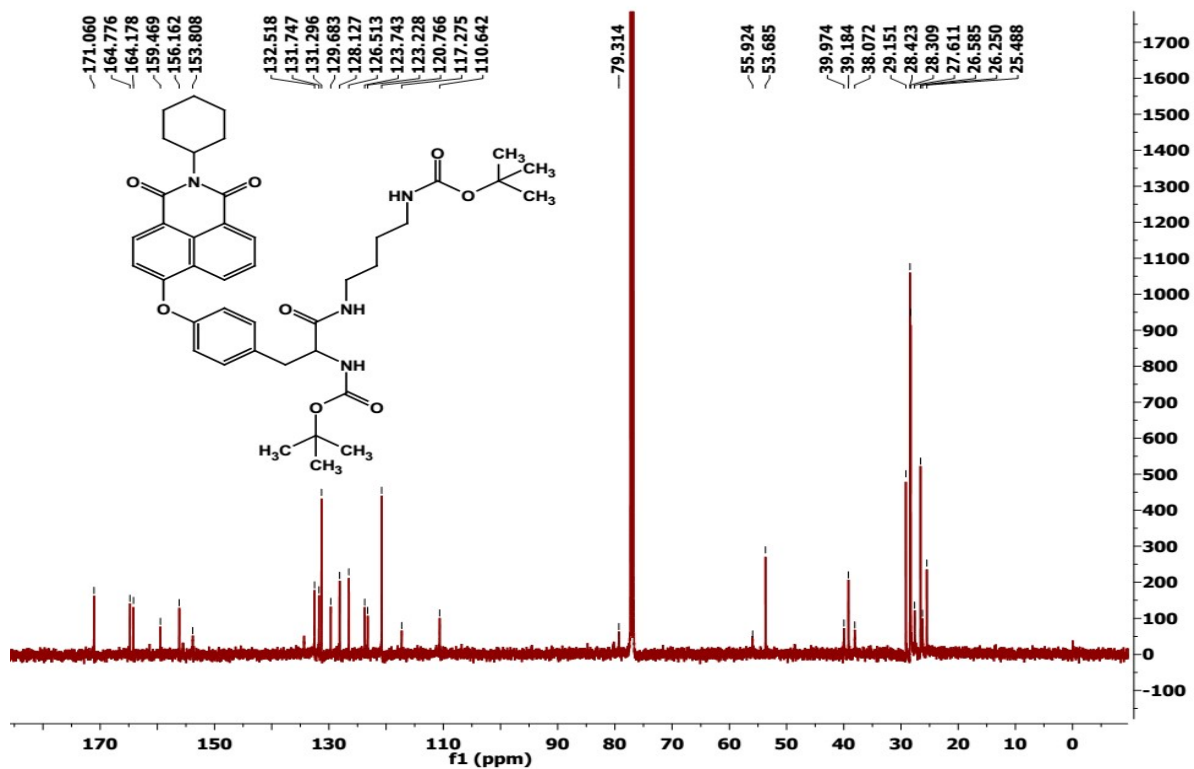

Figure 3b: <sup>13</sup>C NMR Spectrum of compound 4.

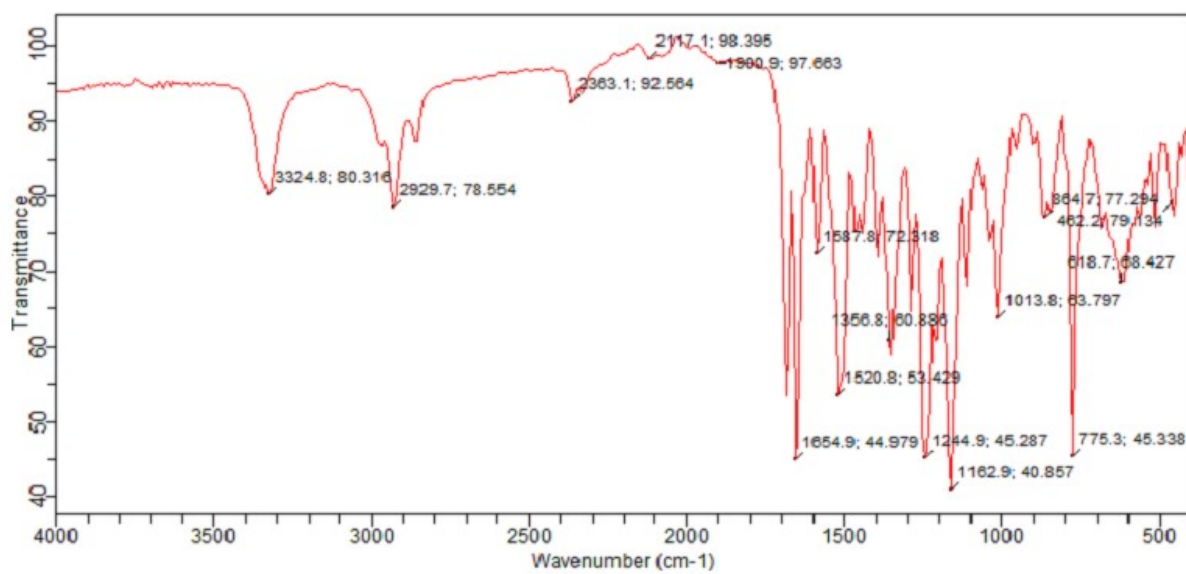

Figure 3c: FTIR Spectrum of compound 4.

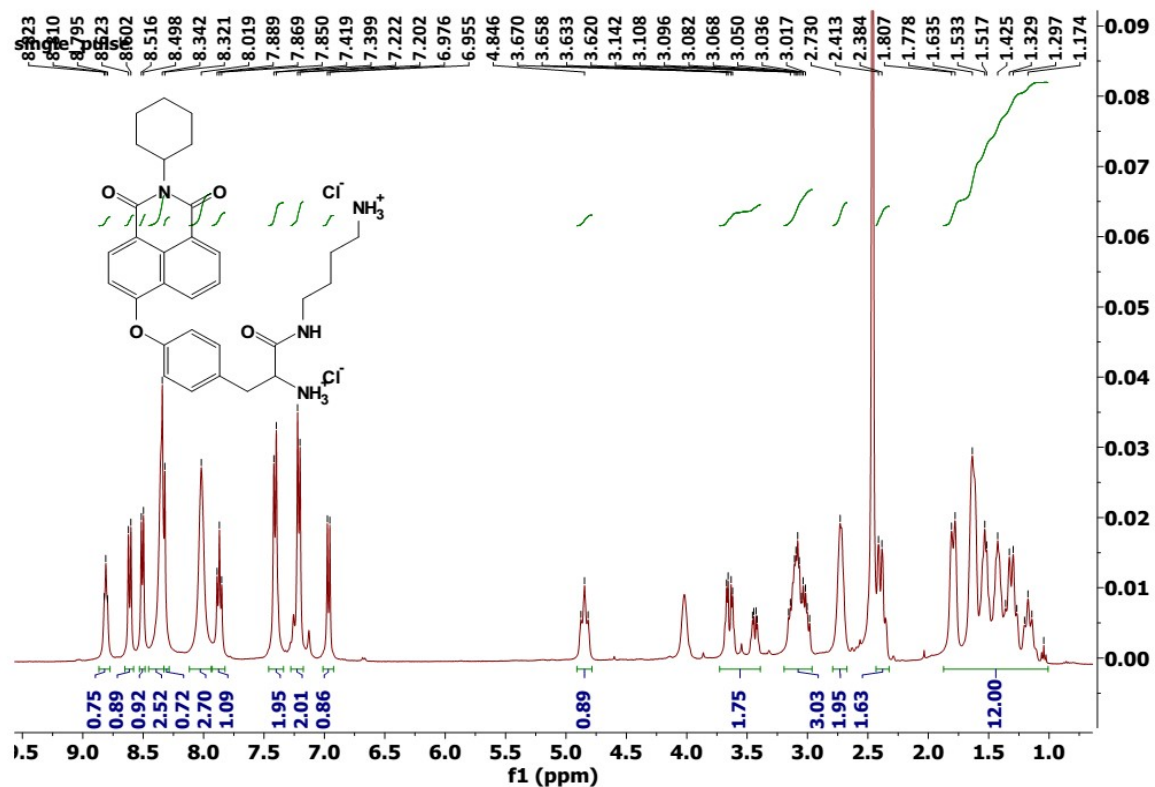

Figure 4a: <sup>1</sup>H NMR Spectrum of compound YN-1.

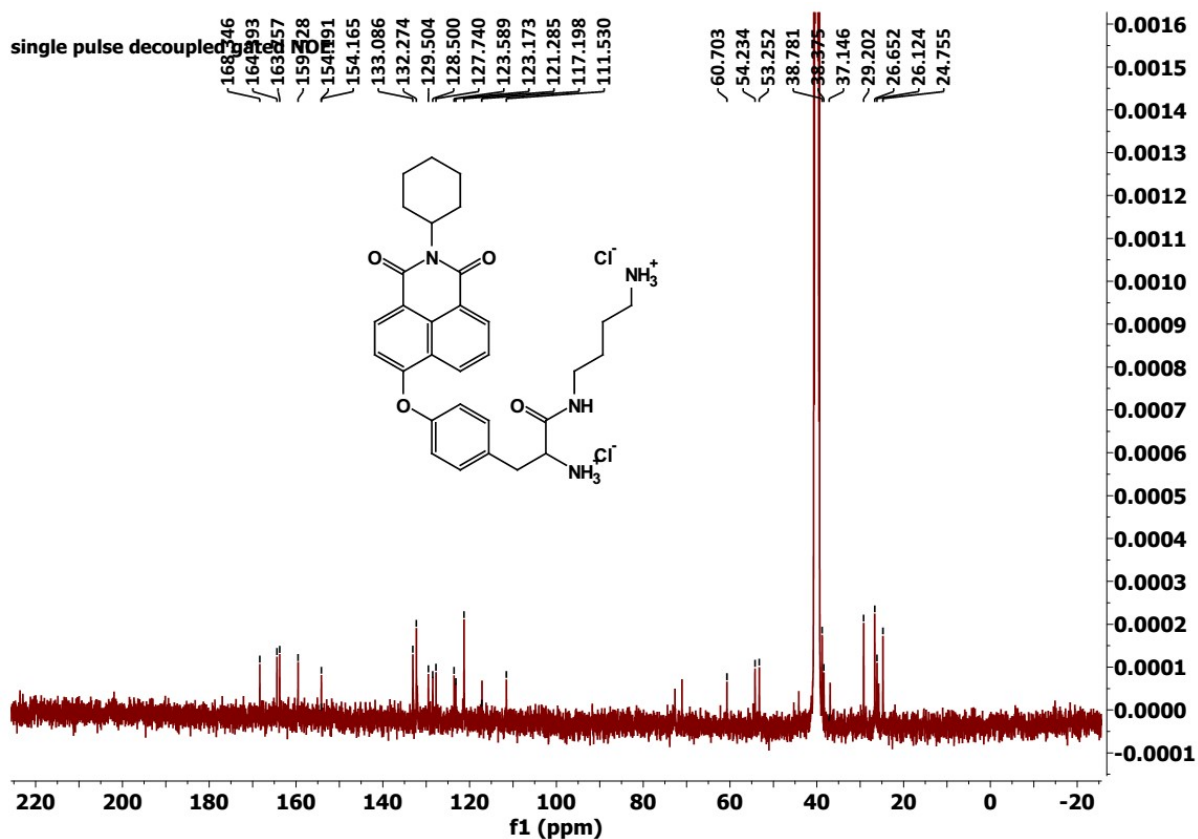

Figure 4b: <sup>13</sup>C NMR Spectrum of compound YN-1.

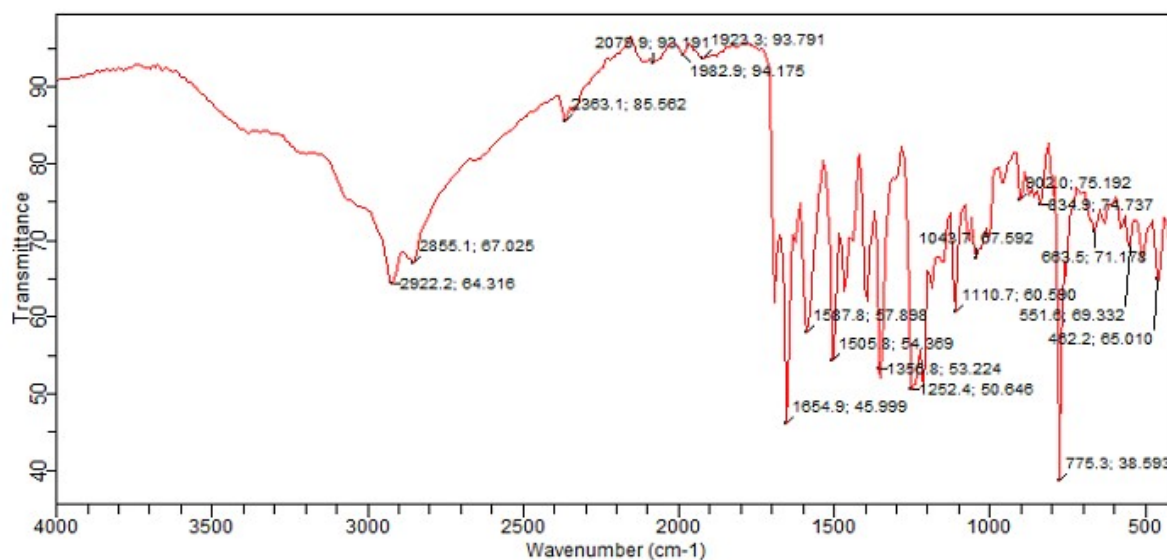

**Figure 4c:** FTIR Spectrum of compound YN-1.

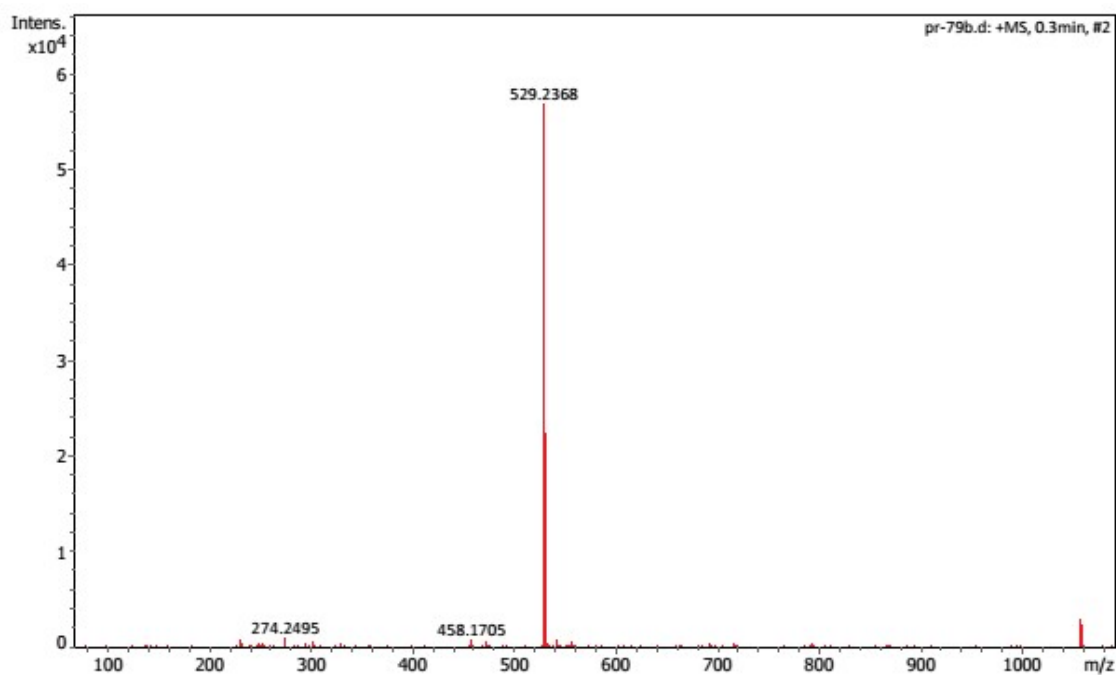

**Figure 4d:** Mass Spectrum of YN-1.

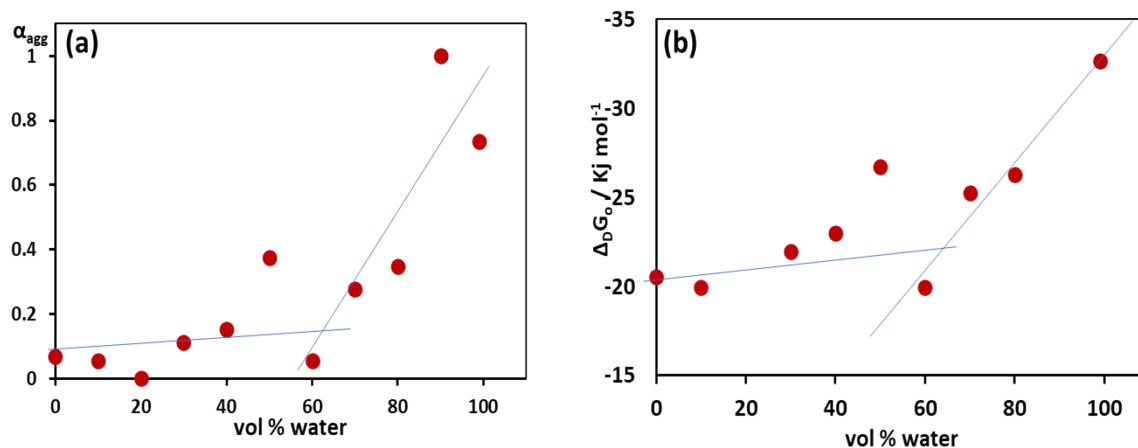

**Figure S5:** determination of degree of aggregation  $\alpha_{agg}$  and Gibbs free energy ( $\Delta G$ ) from absorbance data recorded in 0–100 % water fraction in DMSO.

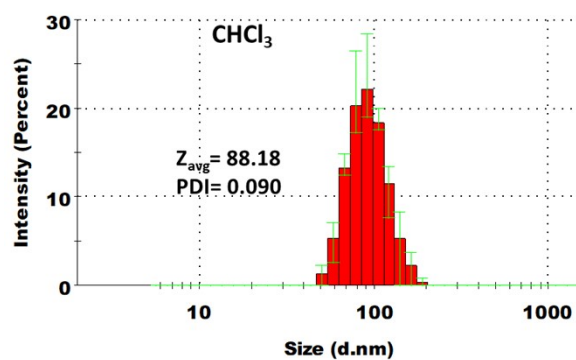

**Figure S6a:** Dynamic light scattering (DLS) data of YN-1 (5  $\mu\text{M}$ ) in  $\text{CHCl}_3$ .

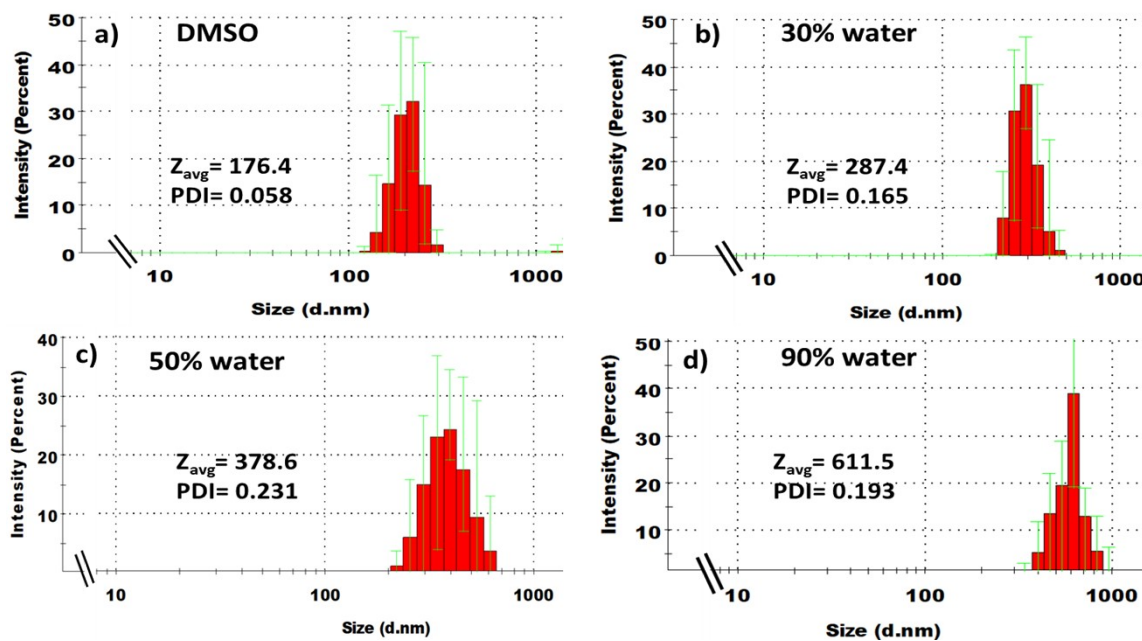

**Figure S6b:** Dynamic light scattering (DLS) data of YN-1 (5  $\mu\text{M}$ ) in (a) DMSO and in different water fractions such as (b) 30% water; (c) 50% water and; (d) 90% water fractions in DMSO for measuring the size of aggregates.



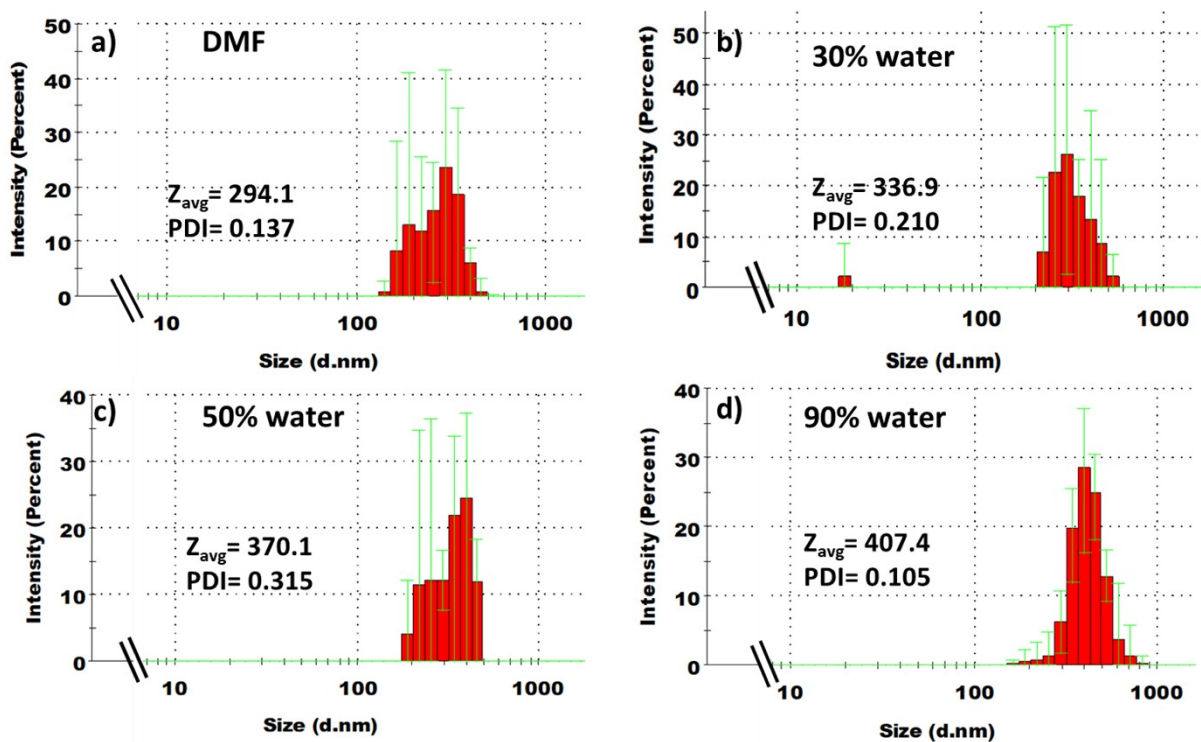

**Figure S6c:** Dynamic light scattering (DLS) data of YN-1 (5  $\mu$ M) in (a) DMF; and different water fractions such as (b) 30%; (c) 50% and (d) 90% in DMF for measuring the size of the aggregates.

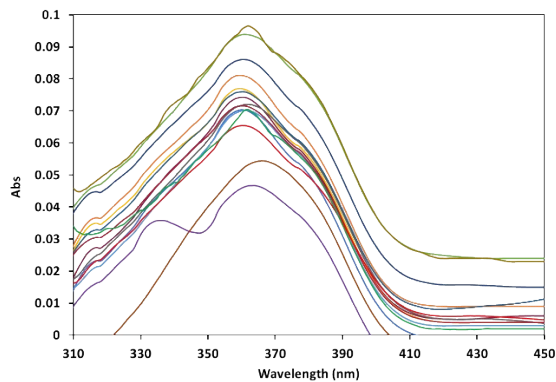

**Figure S7:** Absorbance spectrum of YN-1 (10  $\mu$ M) upon addition of NPPs in HEPES buffer: DMSO (2:8, v/v, pH 7.2) solution.

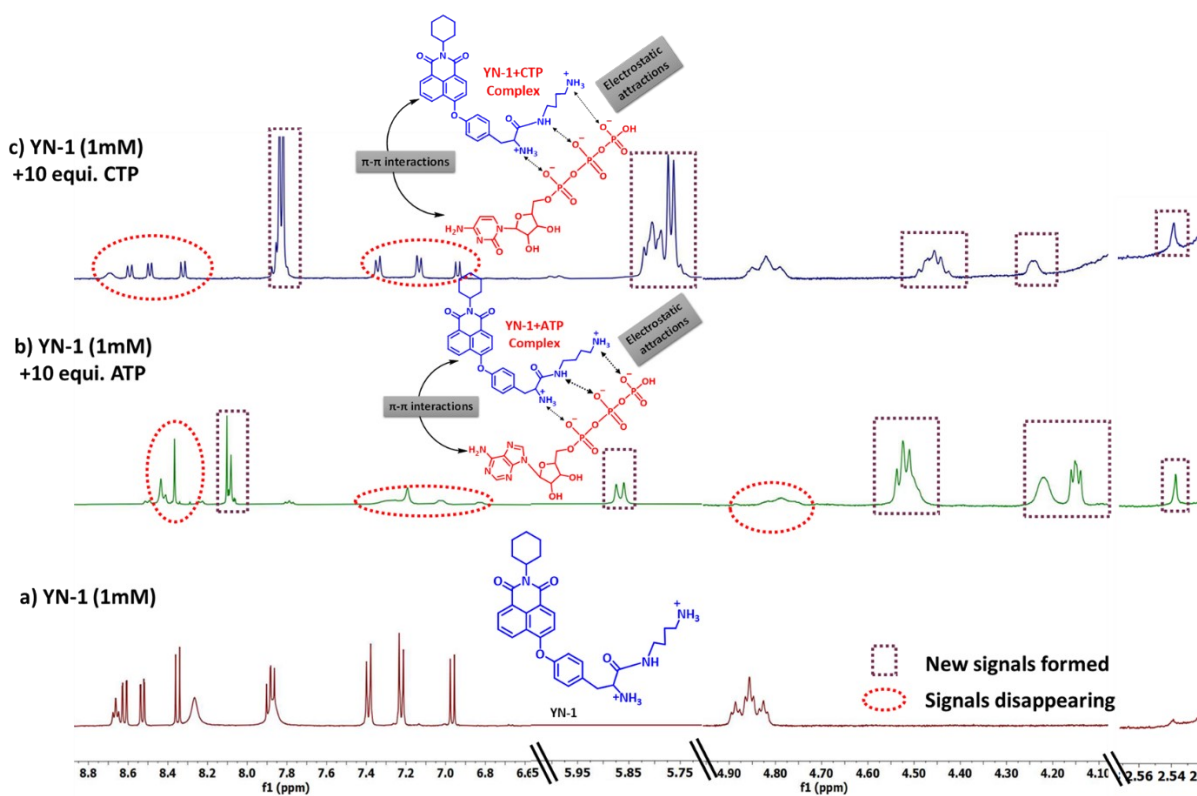

**Figure S8:** Partial  $^1\text{H}$  NMR spectra of a) YN-1 (1 mM) and upon addition of 10 equivalents of b) YN-1+ATP and; c) YN-1+CTP in  $\text{DMSO-}d_6$  solvent showing proposed mechanism and comparison of concentration-based discrimination between ATP and CTP (10 equivalents).

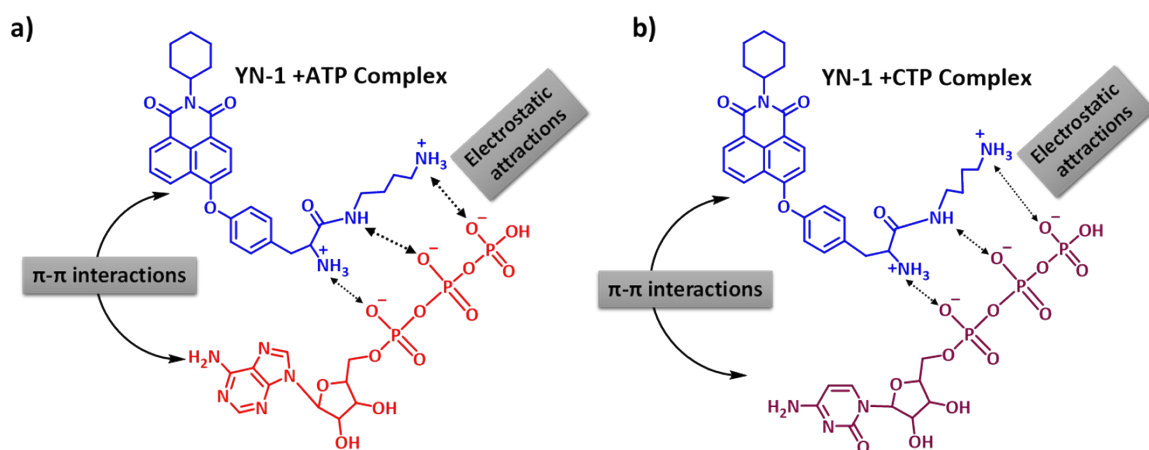

**Figure S9:** Proposed mechanism of a) YN-1 (1 mM) +ATP; and b) YN-1+CTP.

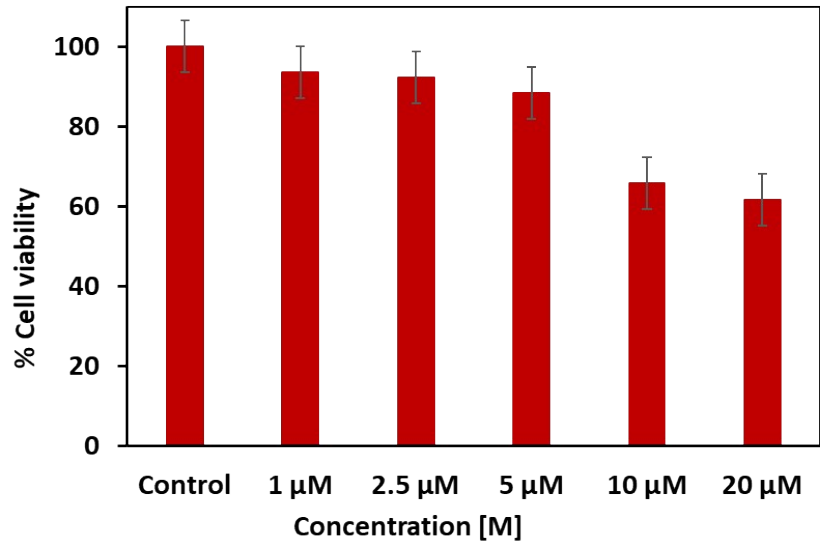

**Figure S10.** The MTT assay of YN-1.

**Table S1.** Summary of the reported fluorescent probes for ATP and CTP. HEPES: 4-(2-hydroxyethyl)-1-piperazineethanesulfonic acid; PBS: phosphate-buffered saline; Tris; tris(hydroxymethyl) aminomethane; DMSO: dimethyl sulfoxide; DMF: dimethylformamide; THF: tetrahydrofuran;  $\lambda_{\text{ex}}$ = excitation wavelength;  $\lambda_{\text{em}}$ = emission wavelength; Sensitivity: lowest detection limit.

| Structure                                                                                                     | Type                                                                                       | Selectivity | Media                                                  | Sensitivity                    | Applications | Ref.               |
|---------------------------------------------------------------------------------------------------------------|--------------------------------------------------------------------------------------------|-------------|--------------------------------------------------------|--------------------------------|--------------|--------------------|
| 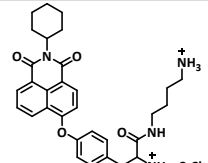 <p>YN-1, Present Design</p> | Turn-on<br>( $\lambda_{\text{ex}}$ = 360 nm,<br>$\lambda_{\text{em}}$ = 440 nm)            | ATP and CTP | HEPES buffer: DMSO (2:8, v/v, pH 7.2)                  | 1.72 nM (ATP);<br>7.1 nM (CTP) | Cell imaging | Present Manuscript |
|                              | Turn-on<br>( $\lambda_{\text{ex}}$ = 323 nm,<br>$\lambda_{\text{em}}$ = 550 nm)            | ATP         | THF: H <sub>2</sub> O (1:1, v/v)                       | 19.6 $\mu$ M                   | -            | 1.                 |
|                             | Turn-on<br>( $\lambda_{\text{ex}}$ = 315 nm,<br>$\lambda_{\text{em}}$ = 564 nm)            | ATP         | PBS buffer (pH = 7.4)                                  | 5 $\mu$ M                      | Cell imaging | 2.                 |
|                            | Turn-on<br>( $\lambda_{\text{ex}}$ = 350 nm,<br>$\lambda_{\text{em}}$ = 380 nm and 550 nm) | ATP<br>CTP  | DMSO: TRIS buffer+100 mM NaCl (0.2:9.8, v/v, pH = 7.4) | 0.08 mM                        | -            | 3.                 |

|                                                                                     |                                                                                                               |                                    |                                                                        |                                                                            |                     |           |
|-------------------------------------------------------------------------------------|---------------------------------------------------------------------------------------------------------------|------------------------------------|------------------------------------------------------------------------|----------------------------------------------------------------------------|---------------------|-----------|
| 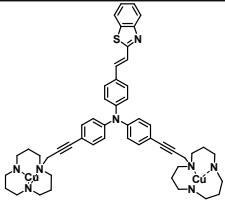   | <p>Turn-on<br/>(<math>\lambda_{\text{ex}}</math> = 405 nm,<br/><math>\lambda_{\text{em}}</math> = 560 nm)</p> | <p>ATP</p>                         | <p>H<sub>2</sub>O</p>                                                  | <p>0.43 <math>\mu</math>M</p>                                              | <p>Cell imaging</p> | <p>4.</p> |
|    | <p>Turn-on<br/>(<math>\lambda_{\text{ex}}</math> = 425 nm,<br/><math>\lambda_{\text{em}}</math> = 602 nm)</p> |                                    | <p>DMF: PBS buffer (0.1:9.9, v/v, pH = 7.4)</p>                        | <p>67.4 nM</p>                                                             | <p>Cell imaging</p> | <p>5.</p> |
|    | <p>Turn-on<br/>(<math>\lambda_{\text{ex}}</math> = 500 nm,<br/><math>\lambda_{\text{em}}</math> = 560 nm)</p> | <p>ATP</p>                         | <p>HEPES (pH 7.4+10% C<sub>2</sub>H<sub>5</sub>OH)</p>                 | <p>3 mM</p>                                                                | <p>Cell imaging</p> | <p>6.</p> |
|    | <p>Turn-on<br/>(<math>\lambda_{\text{ex}}</math> = 500 nm,<br/><math>\lambda_{\text{em}}</math> = 560 nm)</p> | <p>Zn<sup>2+</sup><br/>and ATP</p> | <p>CH<sub>3</sub>CN: 0.01 M HEPES (9:1, v/v; pH 7.4)</p>               | <p>6.7 <math>\mu</math>M (for 1) and<br/>1.7 <math>\mu</math>M (for 2)</p> | <p>-</p>            | <p>7.</p> |
|   | <p>Turn-on<br/>(<math>\lambda_{\text{ex}}</math> = 480 nm,<br/><math>\lambda_{\text{em}}</math> = 634 nm)</p> | <p>ATP</p>                         | <p>C<sub>2</sub>H<sub>5</sub>OH:H<sub>2</sub>O: PBS (0.1:9.9, v/v)</p> | <p>0.05 <math>\mu</math>M</p>                                              | <p>Cell imaging</p> | <p>8.</p> |
|  | <p>Turn-on<br/>(<math>\lambda_{\text{ex}}</math> = 345 nm,<br/><math>\lambda_{\text{em}}</math> = 471 nm)</p> | <p>ATP</p>                         | <p>H<sub>2</sub>O</p>                                                  | <p>1.5 <math>\mu</math>M</p>                                               | <p>Cell imaging</p> | <p>9.</p> |

|                                                                                     |                                                                                                                                     |                   |                                     |                   |                                               |     |
|-------------------------------------------------------------------------------------|-------------------------------------------------------------------------------------------------------------------------------------|-------------------|-------------------------------------|-------------------|-----------------------------------------------|-----|
| 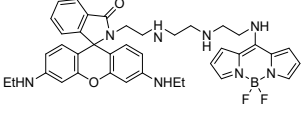   | <p>Turn-on</p> <p>(<math>\lambda_{\text{ex}} = 403 \text{ nm}</math>,<br/><math>\lambda_{\text{em}} = 557 \text{ nm}</math>)</p>    | ATP               | HEPES buffer (pH 5.5)               | -                 | -                                             | 10. |
|    | <p>Turn-on</p> <p>(<math>\lambda_{\text{ex}} = 510 \text{ nm}</math>,<br/><math>\lambda_{\text{emi}} = 591 \text{ nm}</math>)</p>   | ATP<br>ADP<br>CTP | DMSO: PBS (4:6, v/v)                | -                 | Cell imaging                                  | 11. |
|    | <p>Turn-off</p> <p>(<math>\lambda_{\text{ex}} = 440 \text{ nm}</math>,<br/><math>\lambda_{\text{em}} = 518 \text{ nm}</math>)</p>   | ATP<br>ADP        | DMSO:water (9:1, v/v)               | -                 | Cell imaging and In vivo images of zebrafish. | 12. |
|    | <p>Turn-on</p> <p>(<math>\lambda_{\text{ex}} = 520 \text{ nm}</math>,<br/><math>\lambda_{\text{em}} = 583 \text{ nm}</math>)</p>    | ATP               | PBS buffer (pH 7.4)                 | 0.033 mM          | Cell imaging                                  | 13. |
|   | <p>Turn-off</p> <p>(<math>\lambda_{\text{exc}} = 315 \text{ nm}</math>,<br/><math>\lambda_{\text{emi}} = 512 \text{ nm}</math>)</p> | ATP               | CH <sub>3</sub> OH:water (3:1, v/v) | 6.6 $\mu\text{M}$ | Cell imaging                                  | 14. |
|  | <p>Turn-on</p> <p>(<math>\lambda_{\text{ex}} = 510 \text{ nm}</math>,<br/><math>\lambda_{\text{em}} = 583 \text{ nm}</math>)</p>    | ATP               | HEPES buffer (pH 7.2)               | -                 | Cell imaging                                  | 15. |

|                                                                                     |                                                                                                                                                                                                        |                        |                                                                                                                            |                                                                                      |                         |            |
|-------------------------------------------------------------------------------------|--------------------------------------------------------------------------------------------------------------------------------------------------------------------------------------------------------|------------------------|----------------------------------------------------------------------------------------------------------------------------|--------------------------------------------------------------------------------------|-------------------------|------------|
| 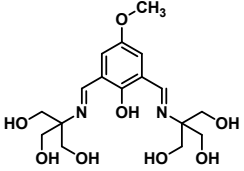   | <p>Turn-off</p> <p>(<math>\lambda_{\text{ex}} = 457 \text{ nm}</math>,<br/><math>\lambda_{\text{em}} = 560 \text{ nm}</math>)</p>                                                                      | <p>ATP and<br/>CTP</p> | <p>TRIS HCl buffer (pH 7.2)</p>                                                                                            | <p>3.9 <math>\mu\text{M}</math> (ATP) and<br/>8.3 <math>\mu\text{M}</math> (CTP)</p> | <p>-</p>                | <p>16.</p> |
|    | <p>Turn-on</p> <p>(<math>\lambda_{\text{ex}} = 420 \text{ nm}</math>,<br/><math>\lambda_{\text{em}} = 580 \text{ nm}</math>)</p>                                                                       | <p>ATP</p>             | <p>HEPES (pH = 7.2)</p>                                                                                                    | <p>0.1 <math>\mu\text{M}</math></p>                                                  | <p>Cell<br/>imaging</p> | <p>17.</p> |
| <p>Terbium(III)-organic framework</p>                                               | <p>Turn-off</p> <p>(<math>\lambda_{\text{ex}} = 330 \text{ nm}</math>,<br/><math>\lambda_{\text{emi}} = 493 \text{ nm}, 546 \text{ nm}, 586 \text{ nm}</math><br/>and <math>623 \text{ nm}</math>)</p> | <p>CTP</p>             | <p>DMF:water (1 : 1, v/v)</p>                                                                                              | <p>-</p>                                                                             | <p>-</p>                | <p>18.</p> |
|    | <p>Turn-on</p> <p>(<math>\lambda_{\text{exc}} = 370 \text{ nm}</math>,<br/><math>\lambda_{\text{emi}} = 538 \text{ nm}</math>)</p>                                                                     | <p>ATP<br/>ADP</p>     | <p>HEPES buffer (pH 7.4, 1% MeCN)</p>                                                                                      | <p>1.0 <math>\mu\text{M}</math></p>                                                  | <p>Cell<br/>imaging</p> | <p>19.</p> |
|  | <p>Turn-on</p> <p>(<math>\lambda_{\text{ex}} = 342 \text{ nm}</math>,<br/><math>\lambda_{\text{em}} = 482 \text{ nm}</math>)</p>                                                                       | <p>ATP</p>             | <p>Polycation buffer<br/>(pH 10.2, 0.5 mM <math>\text{Na}_2\text{CO}_3</math>, 0.5 mM<br/><math>\text{NaHCO}_3</math>)</p> | <p>0.1 <math>\mu\text{M}</math></p>                                                  | <p>In vitro</p>         | <p>20.</p> |

## References

1. D. Giri, S. K. Raut, C. K. Behera, S. K. Patra, , Diketopyrrollopyrrole anchored carbazole-alt-thiophene based Fe<sup>3+</sup>-coordinated metallopolymer for the selective recognition of ATP, *Polymer*, 2022, **253**, 124951.
2. N. H. Kim, B. W. Kim, H. Moon, H. Yoo, R. H. Kang, J. K. Hur, Y. Oh, B. M. Kim, D. Kim, AIEgen-based nanoprobe for the ATP sensing and imaging in cancer cells and embryonic stem cells, *Analytica Chimica Acta*, 2021, **1152**, 338269.
3. A.M. Agafontsev, A.S. Oshchepkov, T.A. Shumilova, E.A. Kataev, Binding and Sensing Properties of a Hybrid Naphthalimide–Pyrene Aza-Cyclophane towards Nucleotides in an Aqueous Solution, *Molecules*, 2021, **26**, 980.
4. W. Sun, G. Liu, M. Tong, H. Wang, S. Liu, A mitochondria-targeting fluorescent sensor for on–off–on response to Cu<sup>2+</sup> and ATP in cells and zebrafish, *Analyst*, 2021, **146**, 1892–1896.
5. Z. Wang, Y. Zhang, J. Yin, M. Li, H. Luo, Y. Yang, X. Xu, Q. Yong, S. Wang, An easily available camphor-derived ratiometric fluorescent probe with AIE feature for sequential Ga<sup>3+</sup> and ATP sensing in a near-perfect aqueous media and its bio-imaging in living cells and mice, *Sensors & Actuators: B. Chemical*, 2020, **320**, 128249.
6. T.-B. Ren, S.-Y. Wen, L. Wang, P. Lu, B. Xiong, L. Yuan, X.-B. Zhang, Engineering a reversible fluorescent probe for real-time live-cell imaging and quantification of mitochondrial ATP, *Analytical Chemistry*, 2020, **92**, 4681-4688.
7. P. Adak, B. Ghosh, A. Bauza, A. Frontera, S. R. Herron, S. K. Chattopadhyay, Binuclear and tetranuclear Zn(II) complexes with thiosemicarbazones: synthesis, X-ray crystal structures, ATP-sensing, DNA-binding, phosphatase activity and theoretical calculations, *RSC Advances*, 2020, **10**, 12735-12746.
8. A.F. Tikum, G. Kim, A. Nasirian, J.W. Ko, J. Yoon, J. Kim, Rhodamine-based near-infrared probe for emission detection of ATP in lysosomes in living cells, *Sensors and Actuators B: Chemical*, 2019, **292**, 40-47.
9. A.-X. Ding, Y.-D. Shi, K.-X. Zhang, W. Sun, Z.-L. Tan, Z.-L. Lu, L. He, Self-assembled aggregation-induced emission micelle (AIE micelle) as an interfacial fluorescence probe for sequential recognition of Cu<sup>2+</sup> and ATP in water, *Sensors and Actuators B: Chemical*, 2018, **255**, 440-447.
10. Y.W. Jun, T. Wang, S. Hwang, D. Kim, D. Ma, K.H. Kim, S. Kim, J. Jung, K.H. Ahn, A Ratiometric Two-Photon Fluorescent Probe for Tracking Lysosomal ATP: Direct In Cellulo Observation of Lysosomal Membrane Fusion Processes, *Angewandte Chemie*, 2018, **130**, 10299-10304.
11. Y. Liu, D. Lee, D. Wu, K. Swamy, J. Yoon, A new kind of rhodamine-based fluorescence turn-on probe for monitoring ATP in mitochondria, *Sensors and Actuators B: Chemical*, 2018, **265**, 429-434.
12. X. Zhang, Y. Jiang, N. Xiao, Monitoring ADP and ATP in vivo using a fluorescent Ga (III)-probe complex, *Chemical Communications*, 2018, **54**, 12812-12815.
13. K.-Y. Tan, C.-Y. Li, Y.-F. Li, J. Fei, B. Yang, Y.-J. Fu, F. Li, Real-time monitoring ATP in mitochondrion of living cells: a specific fluorescent probe for ATP by dual recognition sites, *Analytical chemistry*, 2017, **89**, 1749-1756.
14. C. Patra, C. Sen, A.D. Mahapatra, D. Chattopadhyay, A. Mahapatra, C. Sinha, Pyridylthioether-hydroxycoumarin Schiff base as selective Zn<sup>2+</sup> fluorescence sensor, application in life cell imaging and uses of resulting complex as a secondary probe for ATP sensing, *Journal of Photochemistry and Photobiology A: Chemistry*, 2017, **341**, 97-107.
15. D. de la Fuente-Herreruela, V. González-Charro, V.G. Almendro-Vedia, M. Morán, M.Á. Martín, M.P. Lillo, P. Natale, I. López-Montero, Rhodamine-based sensor for real-time imaging of



- mitochondrial ATP in living fibroblasts, *Biochimica et Biophysica Acta (BBA)-Bioenergetics*, 2017, **1858**, 999-1006.
16. A. K. Gupta, A. Dhir, C. P. Pradeep, Ratiometric Detection of Adenosine-5'-triphosphate (ATP) and Cytidine-5'-triphosphate (CTP) with a Fluorescent Spider-Like Receptor in Water, *Eur. J. Org. Chem.*, 2015, **1**, 122–129.
  17. L. Tang, C.-Y. Li, Y.-F. Li, C.-X. Zou, A ratiometric fluorescent probe with unexpected high selectivity for ATP and its application in cell imaging, *Chemical Communications*, 2014, **50**, 15411-15414.
  18. Xi Juan Zhao, Rong Xing He, Yuan Fang Li, A terbium(III)-organic framework for highly selective sensing of cytidine triphosphate, *Analyst*, 2012, **137**, 5190–5192.
  19. A.S. Rao, D. Kim, H. Nam, H. Jo, K.H. Kim, C. Ban, K.H. Ahn, A turn-on two-photon fluorescent probe for ATP and ADP, *Chemical Communications*, 2012, **48**, 3206-3208.
  20. Y. Kanekiyo, R. Naganawa, H. Tao, Fluorescence detection of ATP based on the ATP-mediated aggregation of pyrene-appended boronic acid on a polycation, *Chemical communications*, 2004, 1006-1007.
